# Supplementary material for: Thrombospondin-1 is a prognostic biomarker and is correlated with tumor immune microenvironment in glioblastoma
Source: PubMed Central journal article supplement — Oncol Lett. 2020 Nov 9;21(1):22. doi: 10.3892/ol.2020.12283 (PMC7681197; doi:10.3892/ol.2020.12283), 2020-11-09
Supplement: Supplementary_Data.pdf [file Supplementary_Data.pdf]

Figure S1. Pearson's correlation coefficient analysis demonstrated that THBS1 expression was positively correlated with mesenchymal biomarkers in The Cancer Genome Atlas-glioblastoma dataset. THBS1, thrombospondin-1.

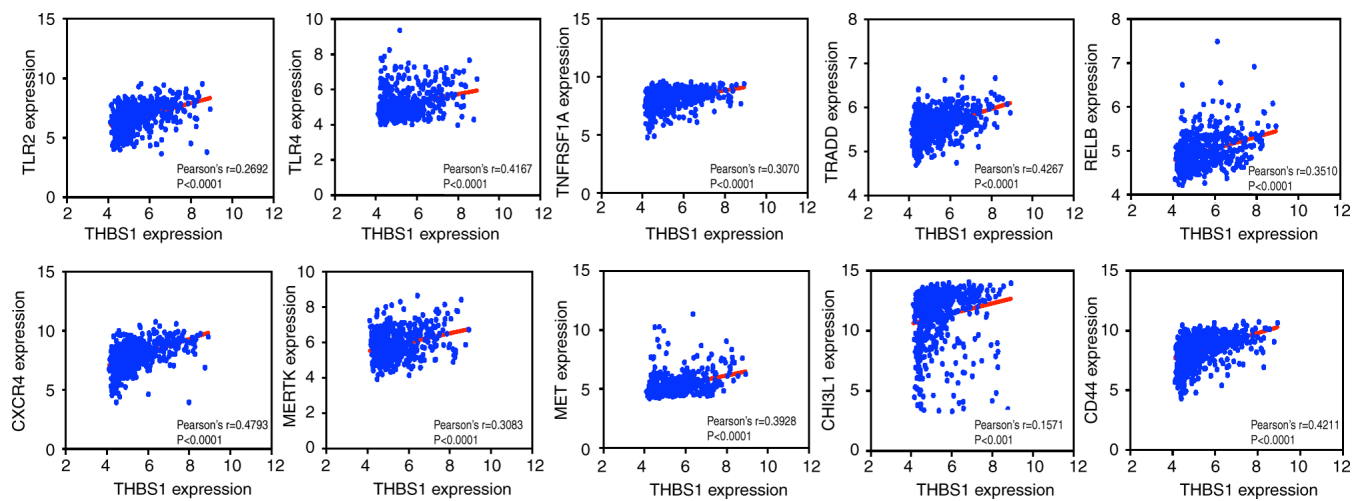

Figure S2. DNA hypomethylation level predicts higher THBS1 expression and IDH-1 wt GBM. (A-D) Four CpG sites were negatively correlated with THBS1 expression as evidenced by the Pearson's correlation coefficient. (E-H) IDH-1 mt GBM was associated with high THBS1 DNA methylation levels. \*\*\*\* $P < 0.0001$ . THBS1, thrombospondin-1; IDH-1, isocitrate dehydrogenase-1; wt, wild-type; GBM, glioblastoma; mt, mutation type.

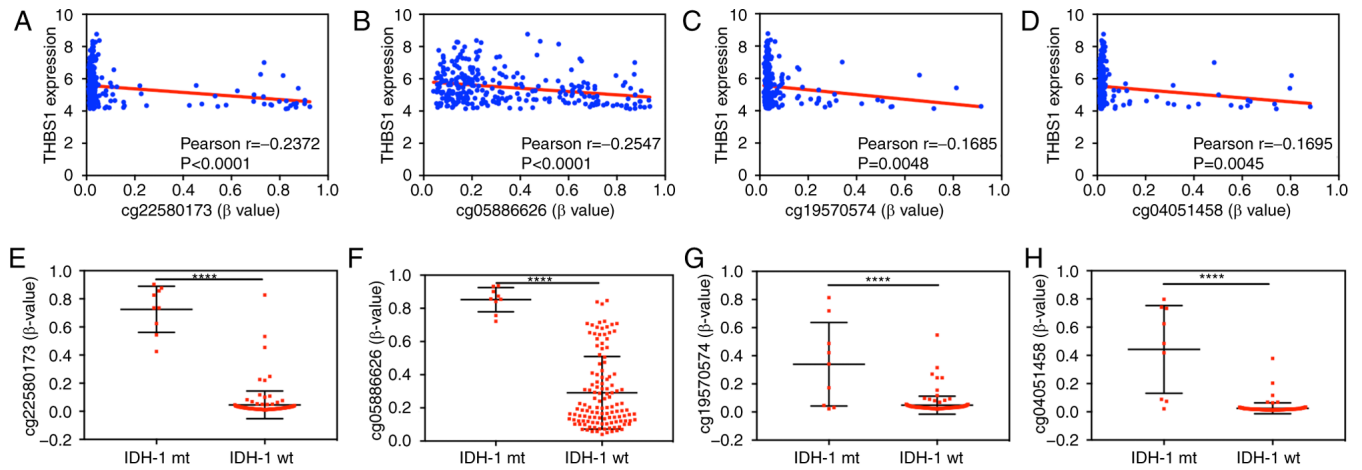

Table SI. Clinical data of the three transcriptome datasets.

|              | TCGA-GBM <sup>a</sup> | CGGA <sup>b</sup> | GSE16011 <sup>a</sup> |
|--------------|-----------------------|-------------------|-----------------------|
| Sex          |                       |                   |                       |
| Female       | 205                   | 122               | 92                    |
| Male         | 320                   | 203               | 184                   |
| NA           | 14                    | 0                 | 8                     |
| Age          |                       |                   |                       |
| ≤50          | 147                   | 233               | 132                   |
| >50          | 378                   | 92                | 144                   |
| NA           | 14                    | 0                 | 8                     |
| WHO grade    |                       |                   |                       |
| Control      | 10                    | 0                 | 8                     |
| LGG          | 0                     | 181               | 117                   |
| GBM          | 529                   | 144               | 159                   |
| NA           | 0                     | 0                 | 0                     |
| IDH-1 status |                       |                   |                       |
| MT           | 13                    | 162               | 83                    |
| WT           | 239                   | 163               | 143                   |
| NA           | 287                   | 0                 | 58                    |
| Total        | 539                   | 325               | 284                   |

<sup>a</sup>Microarray data. <sup>b</sup>RNA sequencing data. NA, not acquired; WHO, World Health Organization; LGG, low-grade glioma; GBM, glioblastoma; IDH-1, isocitrate dehydrogenase-1; MT, mutation type; WT, wild-type; TCGA, The Cancer Genome Atlas; CCGA, Chinese Cancer Genome Atlas.
